# Supplementary material for: Src tyrosine kinase signaling antagonizes nuclear localization of FOXO and inhibits its transcription factor activity
Source: PubMed Central journal article supplement — Sci Rep. 2014 Feb 11;4:4048. doi: 10.1038/srep04048 (PMC3920272; doi:10.1038/srep04048), 2014-02-11
Supplement: srep04048-s1.pdf [file srep04048-s1.pdf]

Supplementary information: “Src tyrosine kinase signaling antagonizes nuclear localization of FOXO and inhibits its transcription factor activity”

Margret H. Bülow, Torsten Bülow, Michael Hoch, Michael J. Pankratz, and Martin A. Jünger

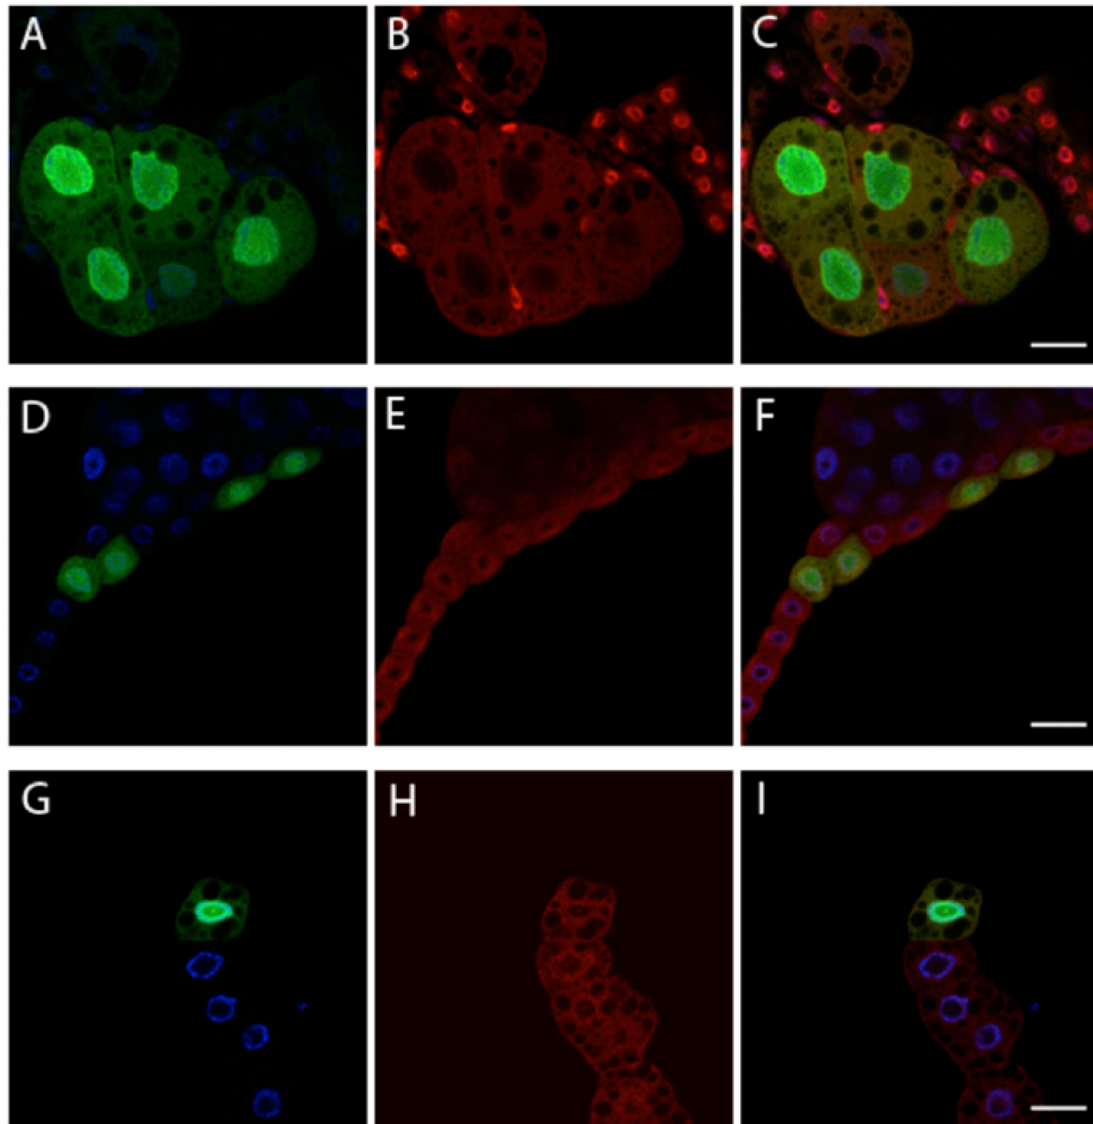

**Supplementary Figure 1:** Effect of insulin receptor and CSK overexpression on fatbody cell size and dFOXO localization. Fatbody clones from late 2<sup>nd</sup> to early 3<sup>rd</sup> instar larvae are shown. Immunostaining was performed with mouse  $\alpha$ -GFP (green),

rabbit  $\alpha$ -dFOXO (red) antibodies and a nuclear DAPI counterstain (blue). **(A-C)** Larvae were raised on yeast for 48 h and starved on PBS for 24 h. GFP-positive, transgene-expressing cells are large despite nutrient deprivation and display cytoplasmic dFOXO localization, while wildtype cells are small and contain mostly nuclear dFOXO. Genotype is *y w hs-flp;; Act>CD2>Gal4 UAS-GFP/UAS dInR*. **(D-F)** Larvae were raised on yeast for 48 h and starved on PBS for 24 h. Genotype is *y w hs-flp;; Act>CD2>Gal4 UAS-GFP/UAS dCSK-IR*. **(G-I)**: Larvae were fed on yeast for 48 h. CSK (C-terminal Src-kinase) is a negative Src regulator, but does not have any effect on the size of fatbody cells or on dFOXO localization in our experiments in either starved or fed conditions. Genotype is *y w hs-flp;; Act>CD2>Gal4 UAS-GFP/UAS dCSK*. Scale bars represent 20  $\mu$ M

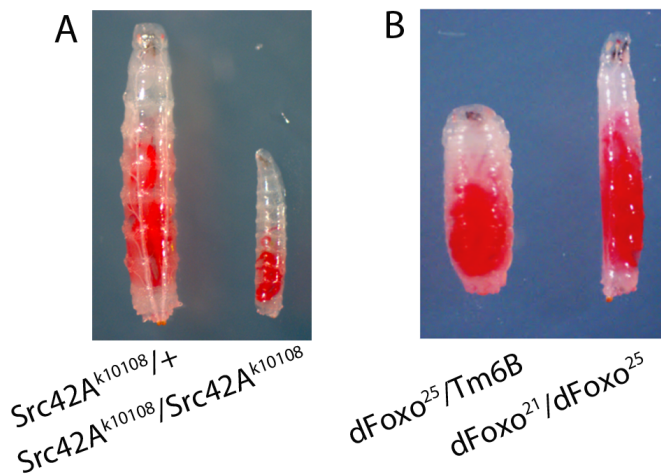

**Supplementary Figure 2:** Food ingestion in Src42A **(A)** and dFOXO **(B)** mutants is normal. 3rd instar hetero- and homozygous *dFOXO<sup>25</sup>* mutant larvae ingest food normally, as shown by the red Carmine dye in the yeast paste.

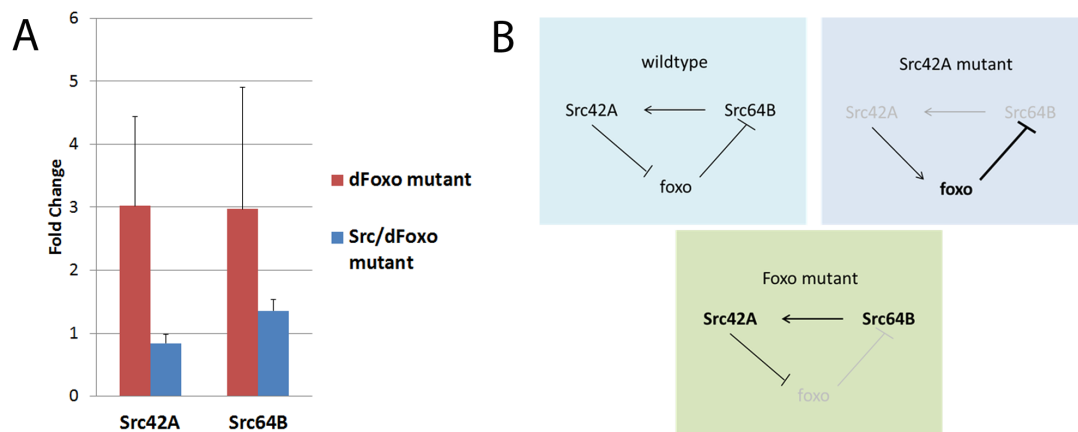

**Supplementary Figure 3:** A putative feedback loop from Src to Src via dFOXO. (A) In dFOXO mutants, the transcription of both Src genes is increased. In the Src-dFOXO double mutants, this increase is absent. It may therefore be speculated that dFOXO is involved in the transcriptional regulation of Src genes (B). Such a “double negative” feedback mechanism (Src inhibits dFOXO inhibits Src) would result in a net positive effect of Src activity on Src transcription, providing a working hypothesis that may explain the observation shown in Figure 3A and 3B, in which both Src genes are transcriptionally repressed in both Src mutants.
